# Supplementary material for: Circulating Tumour DNA in Advanced Melanoma Patients Ceasing PD1 Inhibition in the Absence of Disease Progression
Source: PubMed Central journal article supplement (PMC7700409; doi:10.3390/cancers12113486), 2020-11-23
Supplement: cancers-12-03486-s001.pdf [file cancers-12-03486-s001.pdf]

# Supplementary Material: Circulating Tumour DNA in Advanced Melanoma Patients Ceasing PD1 Inhibition in the Absence of Disease Progression

Lydia Warburton, Leslie Calapre, Michelle R. Pereira, Anna Reid, Cleo Robinson, Benhur Amanuel, Mel Ziman, Michael Millward and Elin Gray

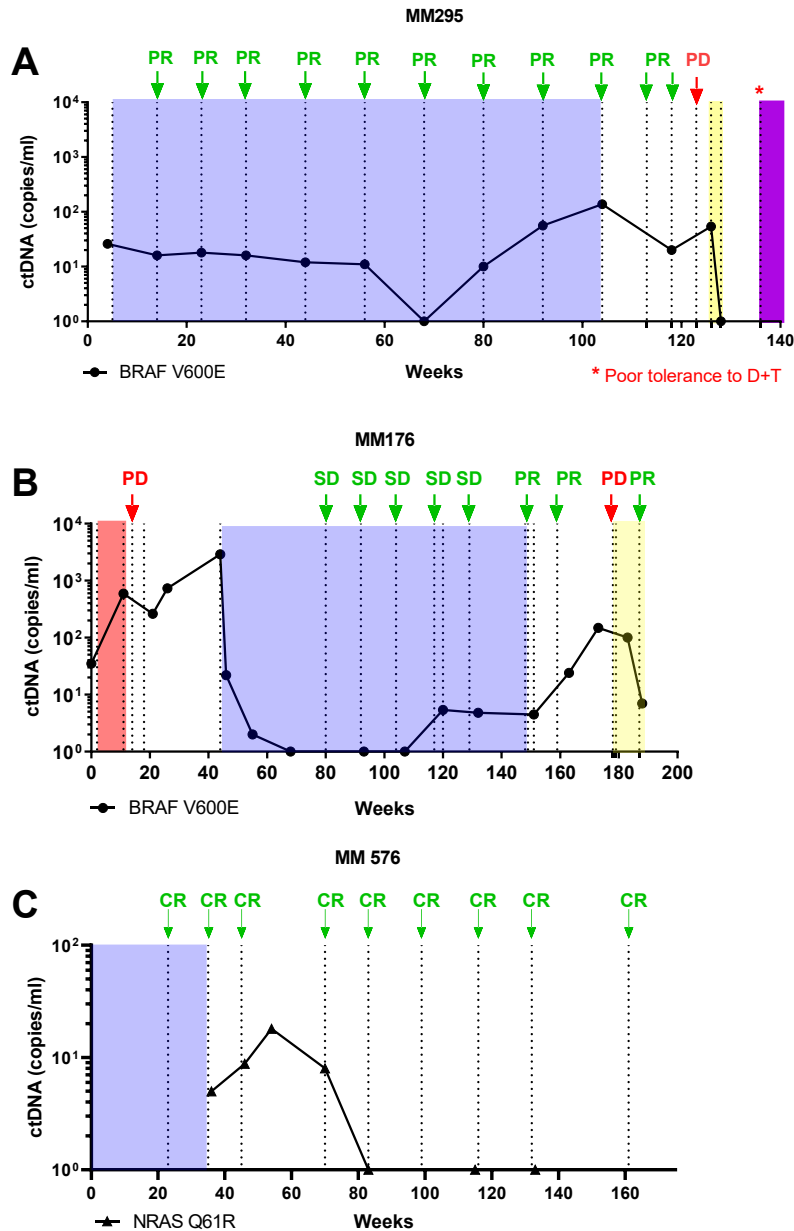

**Figure S1A–S1C:** Graphical representation of clinical outcomes and corresponding ctDNA over time. **S1A.** Patient MM295-BOR was PR and stopped after 2 years of anti-PD1 treatment. ctDNA level was detectable at cessation and rising 100 weeks prior to radiological confirmation of progressive disease. Progression of nodal disease was confirmed by CT/PET and biopsy five months after treatment cessation. This patient re-commenced on BRAF inhibitor treatment (Dabrafenib and Trametinib-yellow) and had an excellent response. Toxicity became unmanageable and was switched to

Vemurafenib and Cobimetinib (purple). Response is ongoing to BRAF/MEK inhibition at 52 months follow up. **S1B.** MM176 achieved PR as BOR after two years of anti-PD1 therapy. Accordingly, ctDNA reduced to undetectable levels. However, after 80 weeks of radiological disease stability, rising plasma ctDNA indicated progressive disease. CT/PET confirmed progression seven months after pembrolizumab was stopped. Treatment was switched to Dabrafenib and Trametinib. This patient died 43.4 months after the commencement of the PD1 inhibitor of disease progression. **S1C.** MM576 completed 8.3 months of pembrolizumab. He attained CR and has maintained it for the duration of follow up. Despite having detectable ctDNA at cessation of therapy, no progression eventuated.

**Table S1.** Detailed list of mutation types identified.

| Mutations detected (n=45) | Number (%) |
|---------------------------|------------|
| BRAF V600E                | 7 (11)     |
| BRAF V600R                | 2 (4)      |
| BRAF V600K                | 2          |
| BRAF L597Q                | 2          |
| BRAF K601E                | 1 (2)      |
| BRAF V600E2               | 1          |
| BRAF E586K                | 1          |
| NRAS Q61K                 | 5 (11)     |
| NRAS Q61R                 | 5          |
| NRAS Q61L                 | 4 (9)      |
| NRAS G12D                 | 2          |
| TERT C250T                | 2          |
| TERT C228T                | 2          |
| RPS27 5'UTR C239T         | 2          |
| GNAQ Q209L                | 1          |
| NF1 P1851S                | 1          |
| DPH3 C8T                  | 1          |
| RAC1 P29S                 | 1          |
| KIT L576P                 | 1          |
| TP53 R248Q                | 1          |
| TP53 S149F                | 1          |

**Table S2.** Detailed list of blood collection time points and outcome relative to cessation.

| Patient Identifier (n=38) | BOR | Mutation   | Blood Collection Time Points |                          |                | Disease and ctDNA Outcome |                  | TFS (mo) |
|---------------------------|-----|------------|------------------------------|--------------------------|----------------|---------------------------|------------------|----------|
|                           |     |            | Pre cessation                | At cessation (copies/mL) | Post cessation | PD                        | ctDNA Detectable |          |
| MM490                     | CR  | NRAS Q61R  | 10 (0)                       | ☒                        | ☒              | No                        | ☒                | 2.0      |
| MM493                     | CR  | BRAF V600E | 15 (3.6)                     | ☒                        | 13 (0)         | No                        | ☒                | 41.6     |
| MM759                     | CR  | TP53 S149F | 6 (0)                        | ☒                        | 1 (0)          | No                        | ☒                | 26.9     |
| MM203                     | CR  | BRAF V600E | 10 (0)                       | ☒                        | ☒              | No                        | ☒                | 42.0     |
| MM481                     | CR  | NRAS G12D  | ☒                            | ☒                        | 9 (0)          | No                        | ☒                | 33.3     |
| MM808                     | CR  | TERT C250T | ☒                            | 0 (0)                    | ☒              | No                        | ☒                | 27.8     |

|       |    |                         |           |            |             |     |     |      |
|-------|----|-------------------------|-----------|------------|-------------|-----|-----|------|
| MM430 | CR | BRAF<br>V600K           | 3<br>(0)  | ☒          | 3<br>(0)    | No  | ☒   | 37.0 |
| MM642 | CR | NRAS Q61L               | ☒         | ☒          | 5<br>(0)    | No  | ☒   | 41.9 |
| MM576 | CR | NRAS Q61R               | ☒         | 0<br>(5)   | 10<br>(8.8) | No  | Yes | 45.1 |
| MM512 | CR | NRAS Q61R               | 9<br>(0)  | ☒          | 2<br>(0)    | No  | ☒   | 36.6 |
| MM669 | CR | BRAF<br>V600E           | 6<br>(0)  | ☒          | 6<br>(0)    | No  | ☒   | 9.9  |
| MM842 | CR | NRAS Q61K               | 6<br>(0)  | ☒          | 15<br>(0)   | No  | ☒   | 16.8 |
| MM536 | CR | NRAS G12D               | ☒         | ☒          | 15<br>(0)   | No  | ☒   | 48.1 |
| MM616 | CR | TERT C250T              | ☒         | 0<br>(0)   | 13<br>(0)   | No  | ☒   | 42.5 |
| MM701 | CR | NRAS Q61K               | ☒         | 0<br>(0)   | ☒           | No  | ☒   | 26.0 |
| MM289 | CR | TP53 R248Q              | 13<br>(0) | ☒          | 3<br>(0)    | No  | ☒   | 51.6 |
| MM846 | CR | NRAS Q61R               | ☒         | 0<br>(0)   | 11<br>(0)   | No  | ☒   | 23.6 |
| MM780 | CR | NRAS Q61R               | 1<br>(0)  | ☒          | 7<br>(0)    | No  | ☒   | 15.4 |
| MM700 | CR | BRAF<br>L597Q           | 10<br>(0) | ☒          | 6<br>(0)    | No  | ☒   | 23.7 |
| MM554 | CR | BRAF<br>V600K           | ☒         | 0<br>(0)   | ☒           | No  | ☒   | 43.3 |
| MM358 | CR | NRAS<br>pQ61K           | 13<br>(0) | 0<br>(0)   | ☒           | No  | ☒   | 43.9 |
| MM319 | CR | BRAF<br>V600R           | 6<br>(0)  | ☒          | ☒           | No  | ☒   | 44.2 |
| MM411 | CR | GNAQ<br>Q209L           | 9<br>(0)  | ☒          | 3<br>(0)    | No  | ☒   | 33.4 |
| MM237 | CR | NRAS Q61K               | 6<br>(0)  | ☒          | 7<br>(0)    | No  | ☒   | 40.9 |
| MM239 | CR | BRAF<br>K601E           | 15<br>(0) | ☒          | 8<br>(0)    | No  | ☒   | 46.8 |
| MM288 | CR | RPS27<br>5'UTR<br>C239T | 6<br>(0)  | ☒          | 1<br>(0)    | No  | ☒   | 20.9 |
| MM748 | PR | NRAS Q61K               | 12<br>(0) | ☒          | 1<br>(0)    | No  | ☒   | 29.7 |
| MM545 | SD | NRAS Q61L               | 1<br>(0)  | ☒          | 12<br>(0)   | No  | ☒   | 38.0 |
| MM798 | CR | BRAF<br>L597Q           | 6<br>(0)  | ☒          | 6<br>(0)    | Yes | ☒   | 11.1 |
| MM534 | CR | KIT L576P               | 9<br>(0)  | ☒          | 3<br>(0)    | Yes | ☒   | 16.1 |
| MM469 | CR | BRAF<br>V600E           | ☒         | ☒          | 13<br>(1.6) | Yes | Yes | 14.2 |
| MM680 | CR | DPH3 C8T                | ☒         | 0<br>(1.4) | 12<br>(3)   | Yes | Yes | 10.1 |
| MM549 | CR | BRAF<br>E586K           | ☒         | ☒          | 3<br>(0)    | Yes | ☒   | 15.8 |
| MM856 | CR | TERT C228T              | 3<br>(0)  | ☒          | ☒           | Yes | ☒   | 4.7  |
| MM326 | CR | TERT C228T              | 12        | 0          | 12          | Yes | ☒   | 21.8 |

|       |    |               |             |          |            |     |     |      |
|-------|----|---------------|-------------|----------|------------|-----|-----|------|
|       |    |               | (0)         | (0)      | (0)        |     |     |      |
| MM630 | CR | BRAF<br>V600E | ☒           | 0<br>(0) | 12<br>(0)  | Yes | ☒   | 14.3 |
| MM295 | PR | BRAF<br>V600E | 9<br>(138)  | ☒        | 5<br>(20)  | Yes | Yes | 2.2  |
| MM176 | PR | BRAF<br>V600E | 16<br>(4.8) | ☒        | 2<br>(4.5) | Yes | Yes | 6.7  |

Abbreviations: BOR, best overall response; ctDNA, circulating tumour DNA; PD, disease progression; TFS, treatment-free survival; ☒, no blood sample available. Highlighted rows = detectable ctDNA within cessation timeframe (=/-16 weeks from cessation).
